# Supplementary material
Source: Springer Nature journal article supplement (https://www.springermedizin.de/resource/supplementary/12990_2010_347_MOESM3_ESM.pdf/9613084)

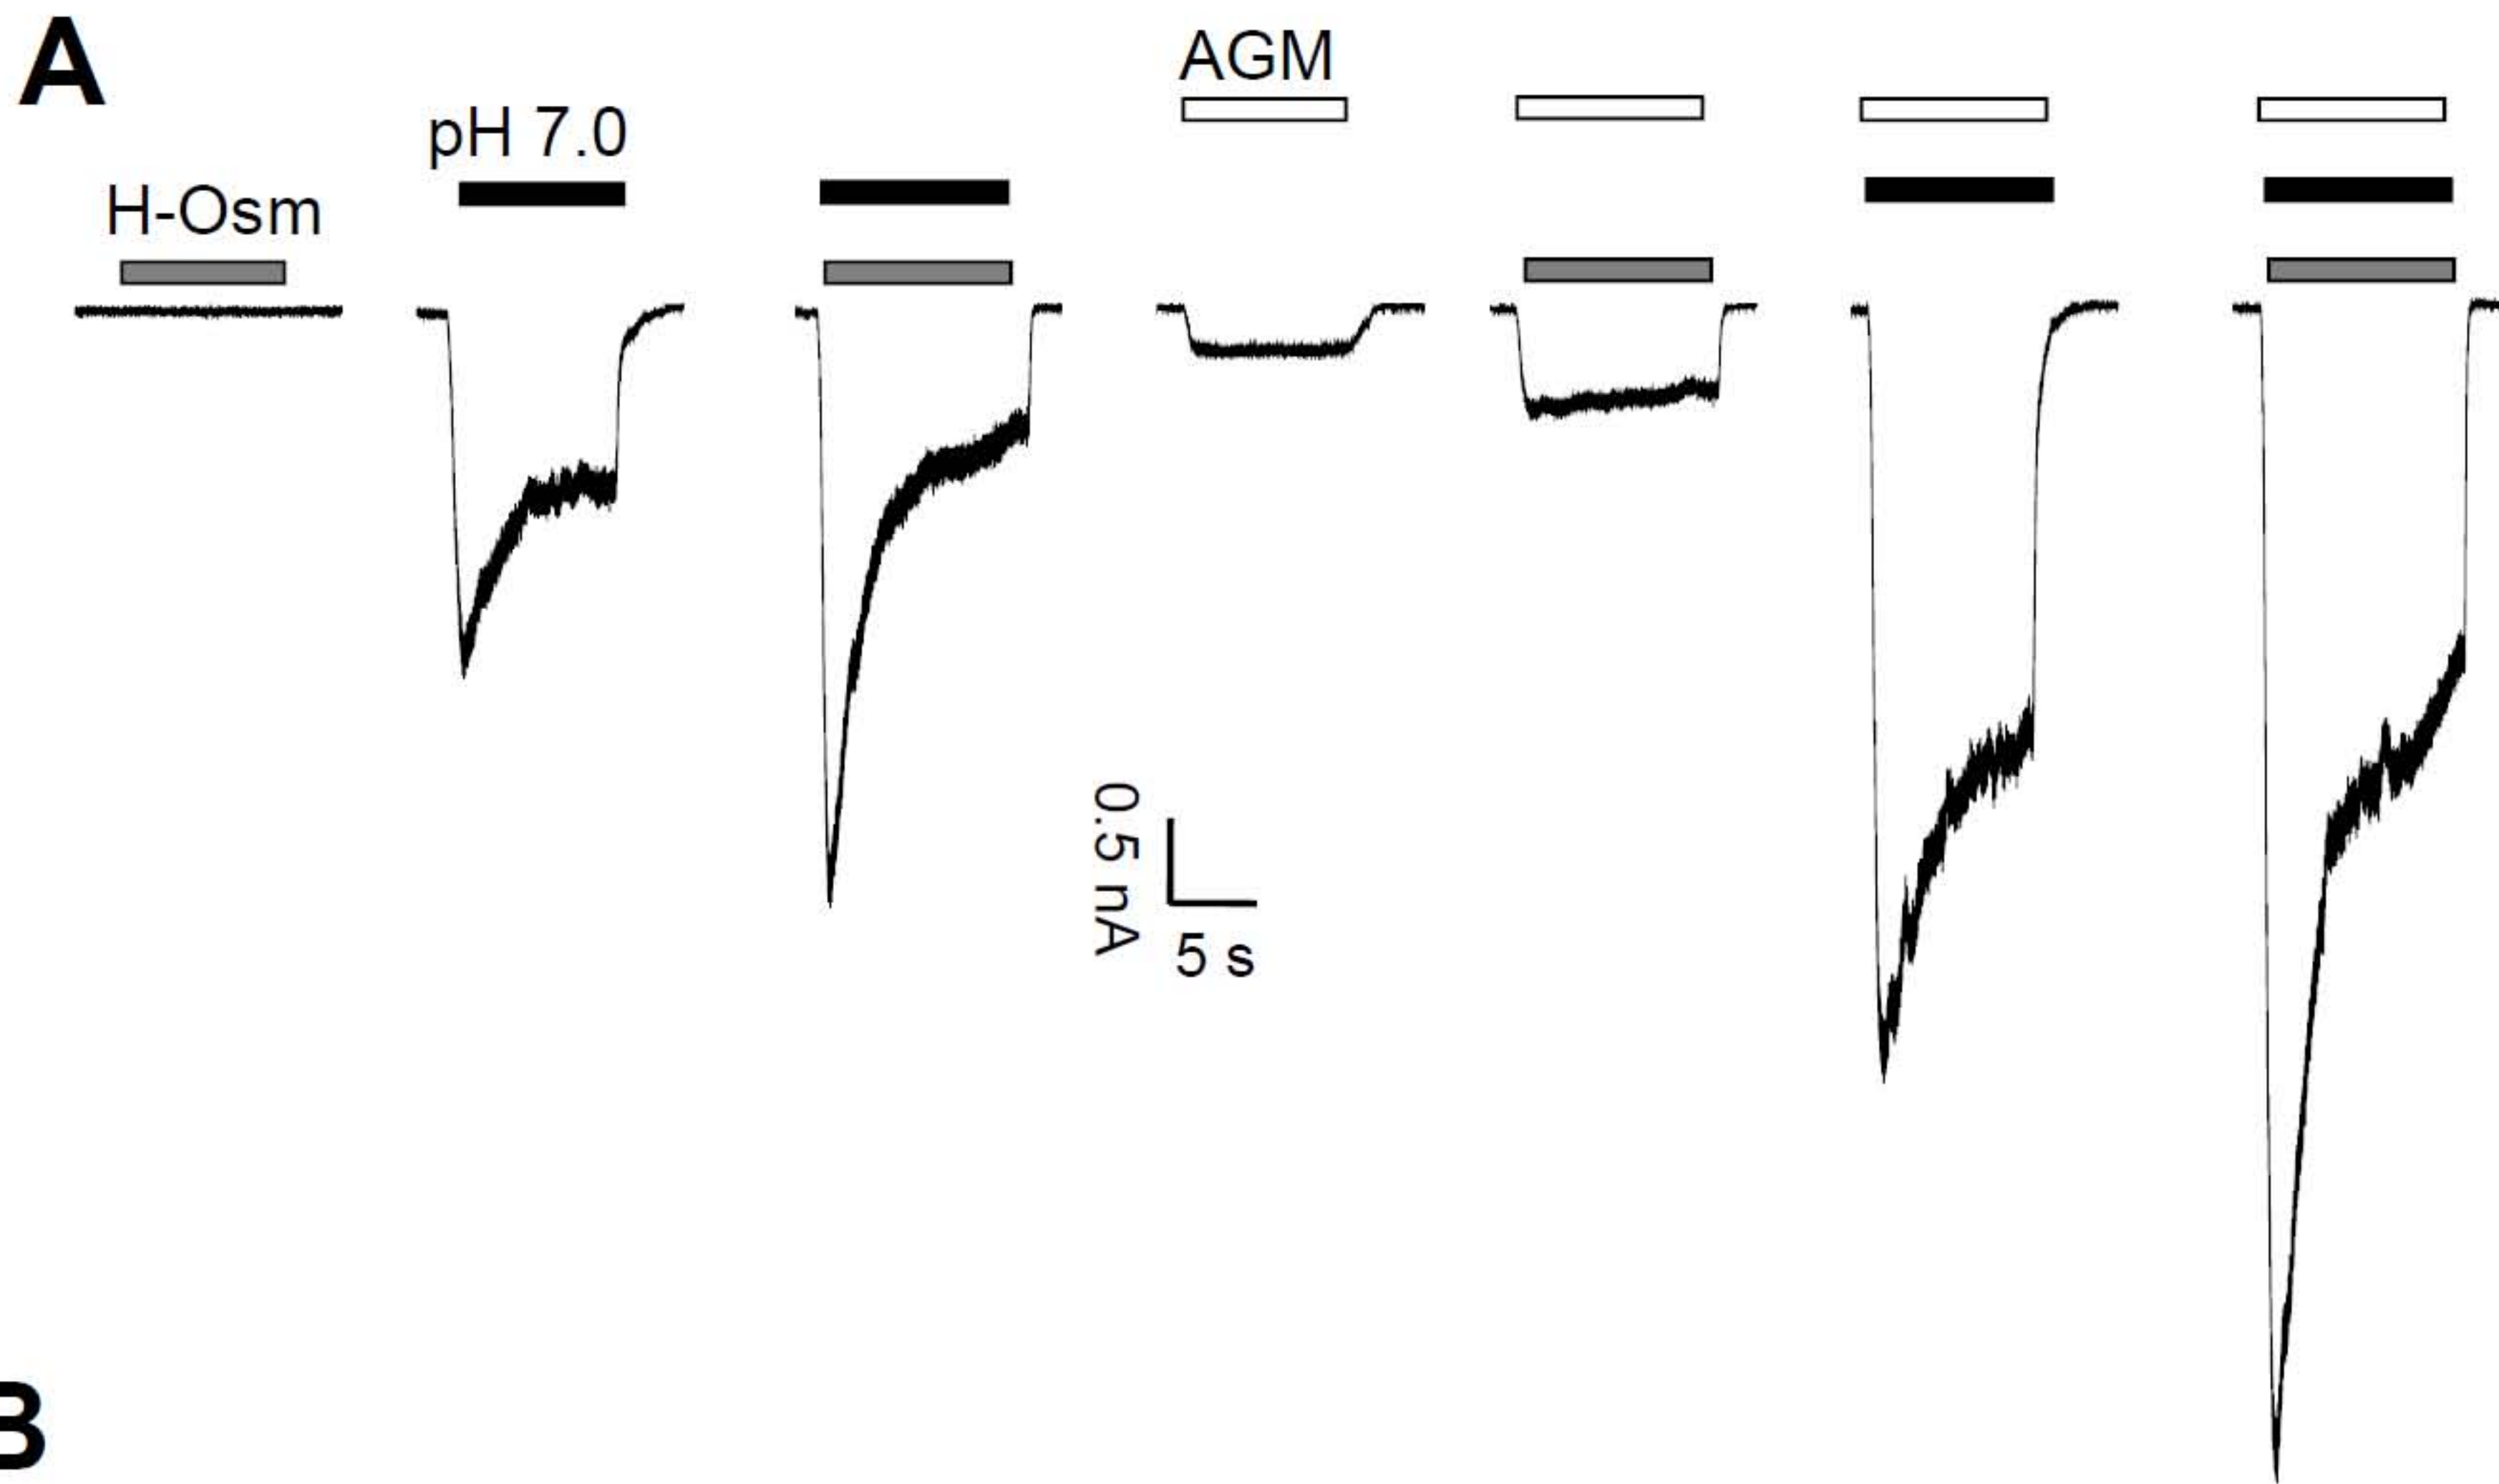

**B**

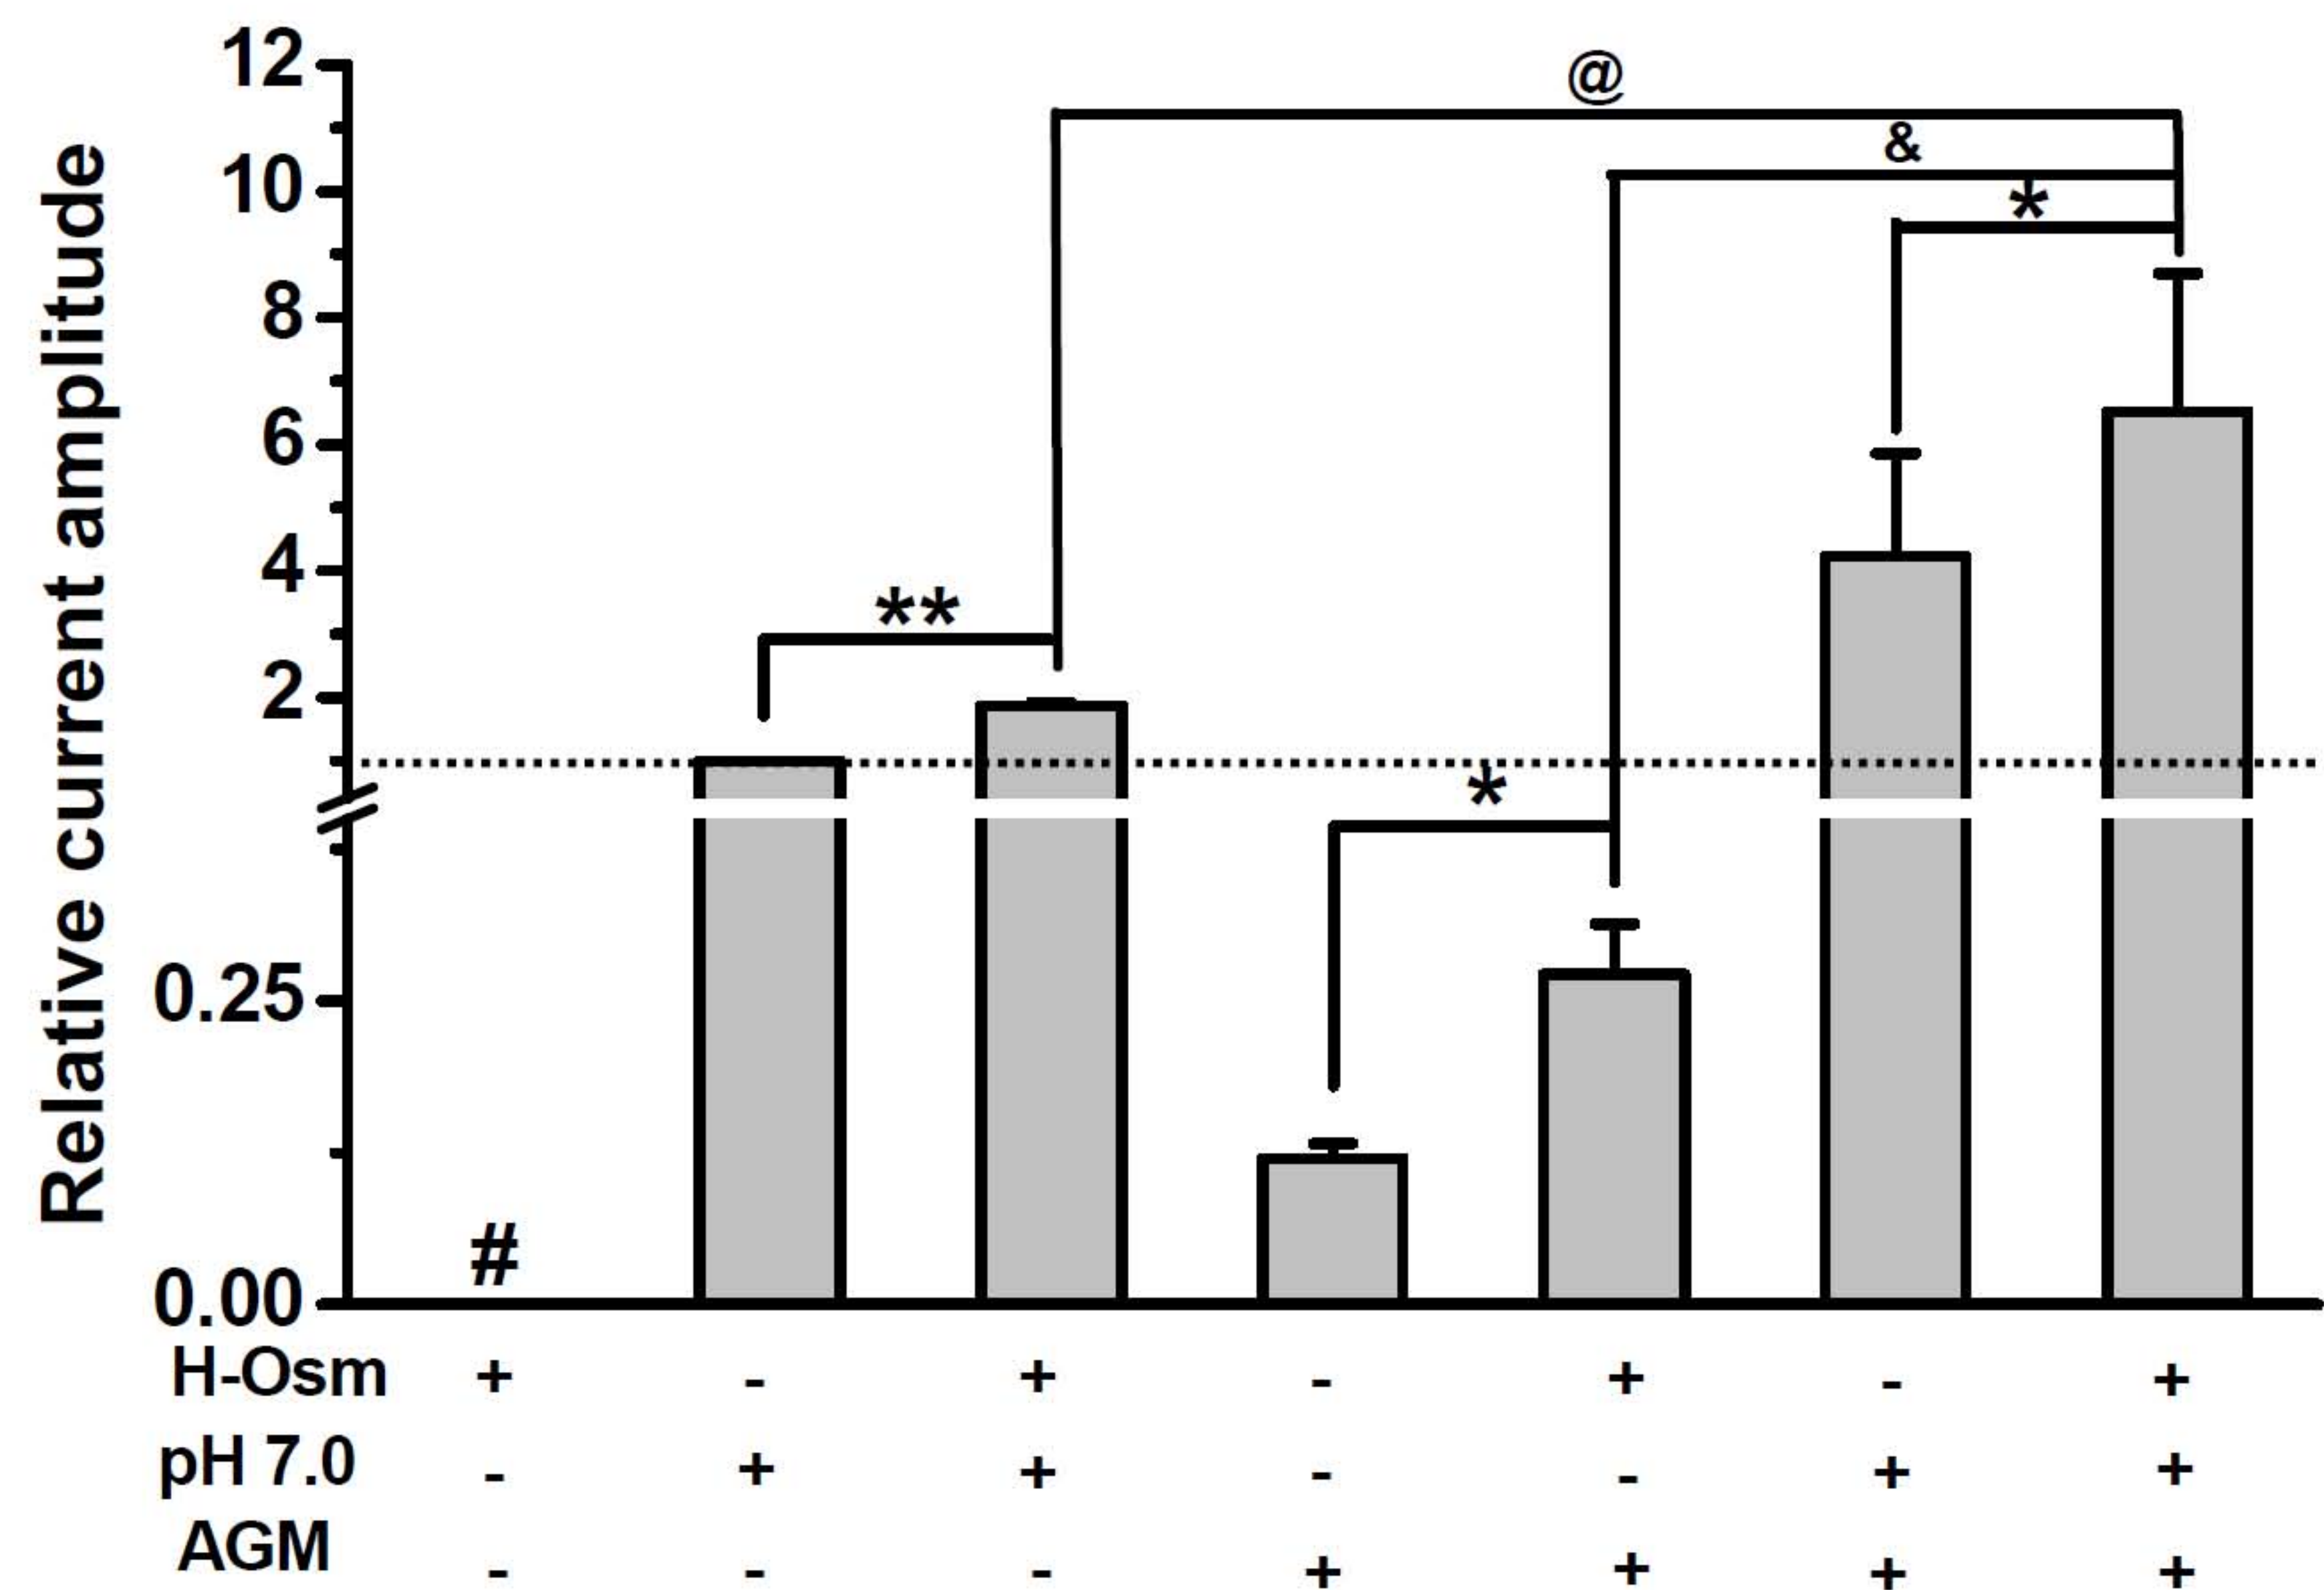

Supplement: MOESM3 [file 9613084]
